# Supplementary material
Source: PubMed Central journal article supplement (PMC1201348)
Supplement: 7600767s3.pdf [file 7600767s3.pdf]

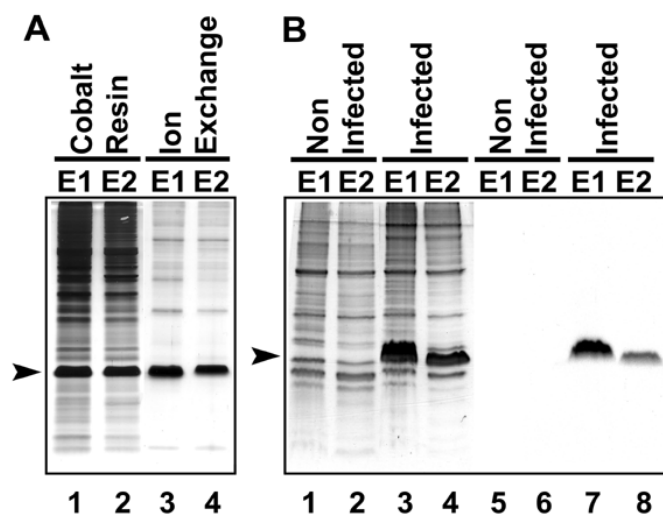

**Supplementary Fig. 2.** Purification of p14. (A) Cell lysates were prepared from SF21 cells infected with a baculovirus recombinant expressing His-tagged p14, and p14 was purified using cobalt resin and ion exchange chromatography. Proteins present in elutions 1 and 2 (E1 and E2) from the cobalt column (lanes 1 and 2) and ion exchange column (lanes 3 and 4) were resolved by SDS-PAGE and detected by silver-staining. The arrowhead indicates the p14 protein. (B) Proteins from uninfected and baculovirus-infected SF21 cells incubated with [ $^3\text{H}$ ]myristic acid were partially purified using cobalt resin and p14 present in elutions 1 and 2 (E1 and E2) was detected by SDS-PAGE and Coomassie blue staining (lanes 1-4) or fluorography (lanes 5-8). Bands in lanes 7 and 8 reveal radiolabeled p14 protein, indicating the baculovirus-expressed protein contained the essential N-terminal myristate moiety.
