# Supplementary material
Source: PubMed Central journal article supplement (PMC1201348)
Supplement: 7600767s6.pdf [file 7600767s6.pdf]

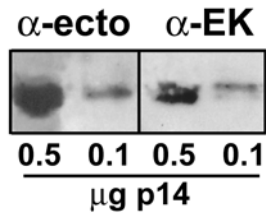

**Supplementary Fig. 5.** Western blot analysis of anti-p14 antibodies. Serial five-fold dilutions of purified p14 were resolved by SDS-PAGE and analyzed by Western blotting using 1/10,000 dilutions of polyclonal antiserum specific for the p14 N-terminal ectodomain ( $\alpha$ -ecto) or for the C-terminal enterokinase tag ( $\alpha$ -EK). The quantity of p14 in duplicate adjacent wells is indicated.
