# Supplementary material
Source: PubMed Central journal article supplement (PMC1201348)
Supplement: 7600767s7.pdf [file 7600767s7.pdf]

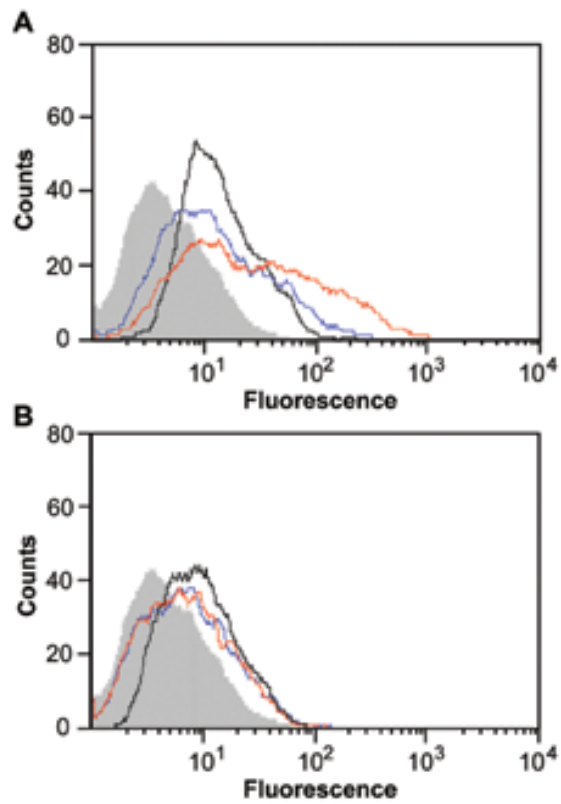

**Supplementary Fig. 6.** Timecourse analysis by flow cytometry of content-mixing at 37°C between calcein-loaded p14-proteoliposomes (A) or standard liposomes lacking p14 (B) and target QM5 cells. The line tracings indicate fluorescence intensity at t=0 (black line), t=10 (blue line) and t=40 (red line) min. The shaded histogram represents cell autofluorescence.
